# Supplementary material for: The Mobility Enhancement of Indium Gallium Zinc Oxide Transistors via Low-temperature Crystallization using a Tantalum Catalytic Layer
Source: PubMed Central journal article supplement (PMC5589867; doi:10.1038/s41598-017-11461-0), 2017-09-07
Supplement: 41598_2017_11461_MOESM1_ESM.pdf [file 41598_2017_11461_MOESM1_ESM.pdf]

Supplementary Information

The Mobility Enhancement of Indium Gallium Zinc  
Oxide Transistors via Low-temperature Crystallization  
using a Tantalum Catalytic Layer

*Yeonwoo Shin<sup>1</sup>, Sang Tae Kim<sup>1</sup>, Kuntae Kim<sup>2</sup>, Mi Young Kim<sup>2</sup>, Saeroonter Oh<sup>3\*</sup>, and Jae  
Kyeong Jeong<sup>1\*</sup>*

<sup>1</sup> Department of Electronic Engineering, Hanyang University, Seoul 133-791, Republic of  
Korea

<sup>2</sup> Department of Materials Science and Engineering, Seoul National University, Seoul 151-  
742, Republic of Korea

<sup>3</sup> Division of Electrical Engineering, Hanyang University, Ansan, Gyeonggi-do, 15588,  
Korea

AUTHOR EMAIL ADDRESS: S. Oh ([sroonter@hanyang.ac.kr](mailto:sroonter@hanyang.ac.kr)); J. K. Jeong  
([jkjeong1@hanyang.ac.kr](mailto:jkjeong1@hanyang.ac.kr))

# I. FABRICATION OF IGZO DEVICES

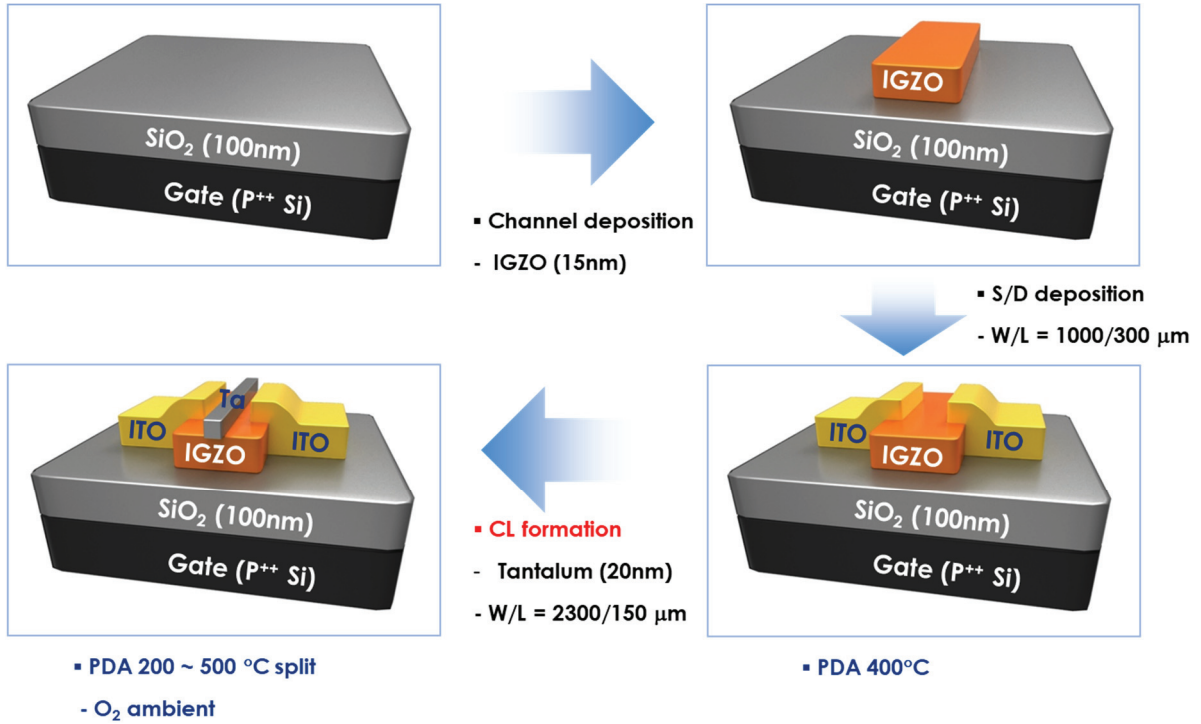

Figure S1. Procedure of Ta capped IGZO TFTs.

## II. STRUCTURAL PROPERTY OF TANTALUM OXIDE FILMS

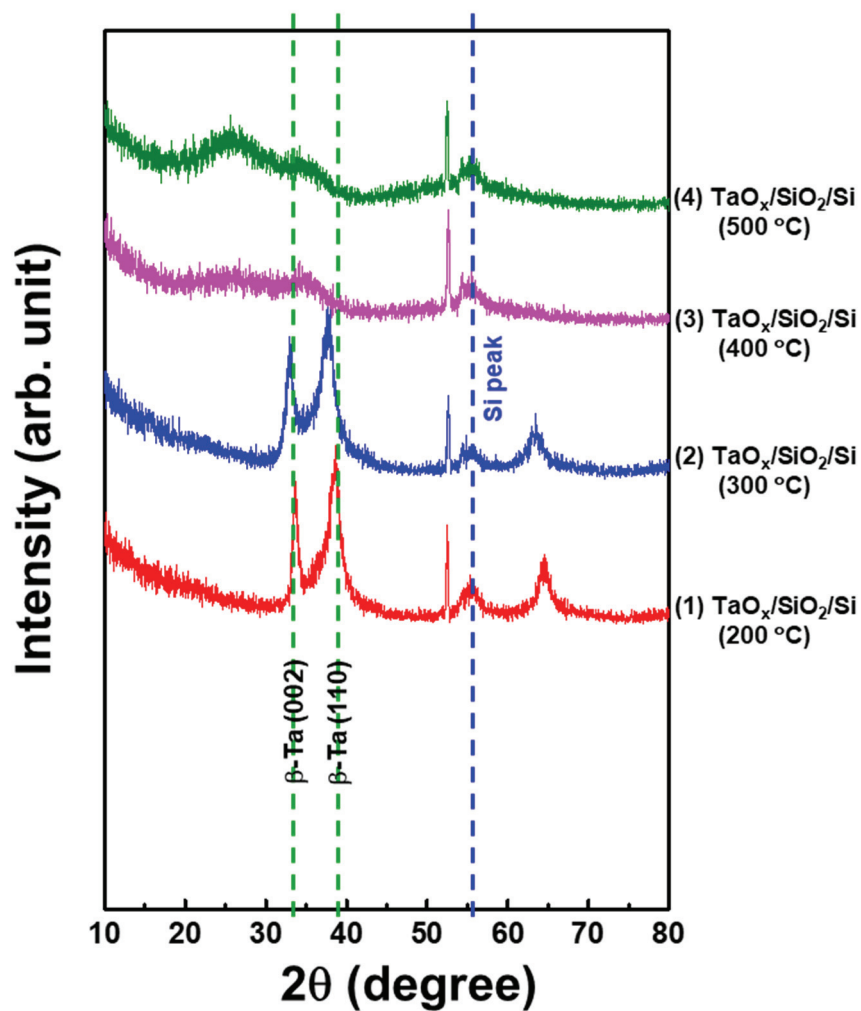

**Figure S2.** XRD spectra of the TaO<sub>x</sub>/SiO<sub>2</sub>/Si stack without IGZO channel layer, after annealing at various temperatures under O<sub>2</sub> atmosphere.

### III. CHEMICAL STATES OF IGZO FILMS

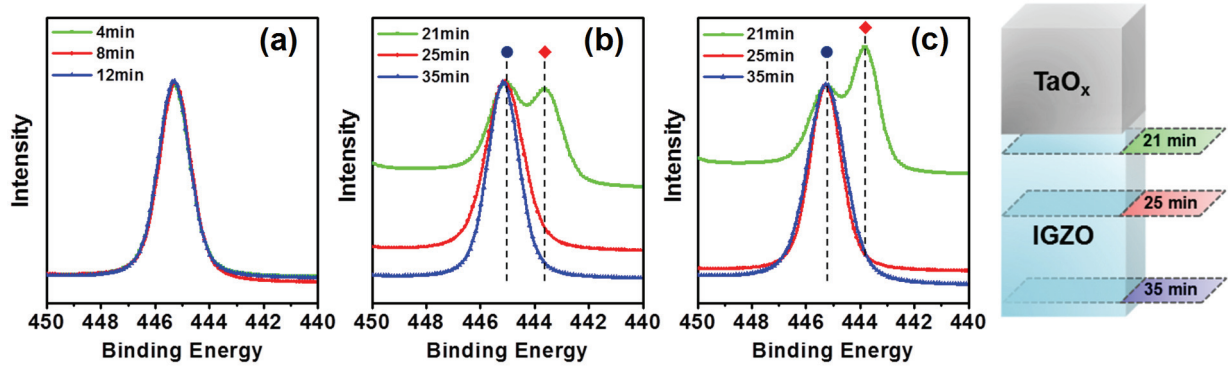

**Figure S3.** In  $3d_{5/2}$  XPS spectra of the (a) reference IGZO sample, (b) Ta/IGZO sample annealed at 200 °C, and (c) Ta/IGZO sample annealed at 300 °C under O<sub>2</sub> atmosphere. Green line data for the Ta/IGZO samples annealed at 200 and 300 °C were taken from the IGZO film near TaO<sub>x</sub>/IGZO interface. In  $3d_{5/2}$  XP spectra can be de-convoluted into the In-O lattice and metallic In related sub peaks, which corresponds to 445.2 and 443.6 eV, respectively. Conversely, the bulk IGZO films far away the TaO<sub>x</sub>/IGZO interface exhibit only the In-O lattice subpeak.

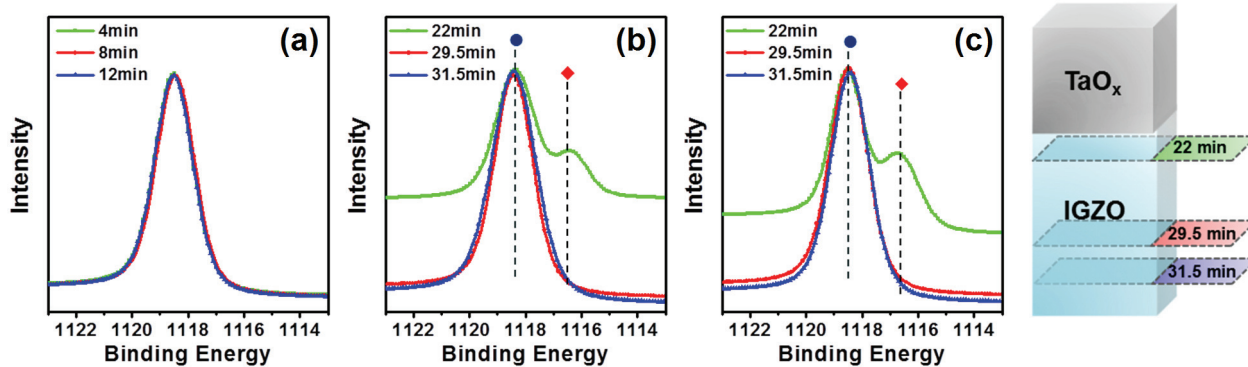

**Figure S4.** Ga  $2p$  XPS spectra of the (a) reference IGZO sample, (b) Ta/IGZO sample annealed at 200 °C, and (c) Ta/IGZO sample annealed at 300 °C under  $O_2$  atmosphere. Green line data for the Ta/IGZO samples annealed at 200 and 300 °C were taken from the IGZO film near  $TaO_x$ /IGZO interface. Ga  $2p_{3/2}$  XP spectra can be de-convoluted into the Ga-O lattice and metallic Ga related sub peaks, which corresponds to 1118.4 and 1116.4 eV, respectively. Conversely, the bulk IGZO films far away the  $TaO_x$ /IGZO interface exhibit only the Ga-O lattice subpeak.

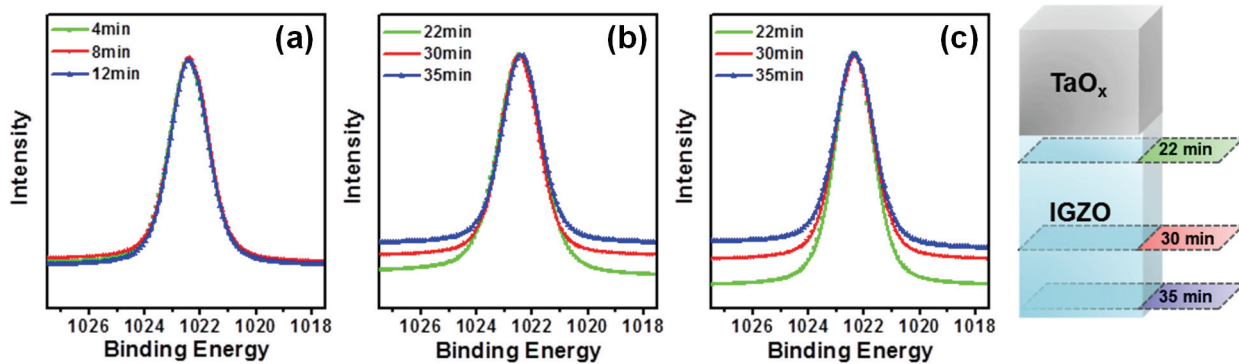

**Figure S5.** Zn  $2p_{3/2}$  XPS spectra of the (a) reference IGZO sample, (b) Ta/IGZO sample annealed at 200 °C, and (c) Ta/IGZO sample annealed at 300 °C under O<sub>2</sub> atmosphere. Green line data for the Ta/IGZO samples annealed at 200 and 300 °C were taken from the IGZO film near TaO<sub>x</sub>/IGZO interface. Irrespectively of the depth position, Zn  $2p_{3/2}$  XP spectra had only Zn-O lattice peak at 1022.4 eV. It indicates that the chemical reaction of catalytic Ta and IGZO film causes the preferential breaking of In-O and Ga-O bonds.

#### IV. STRUCTURAL PROPERTY OF IGZO FILM

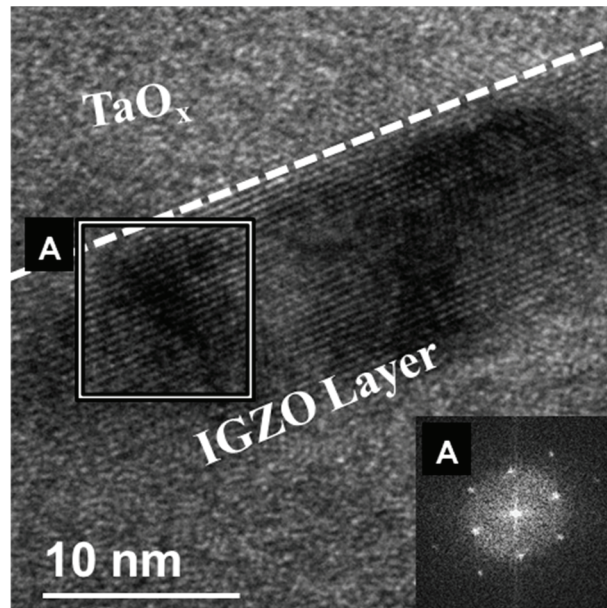

**Figure S6.** Cross-sectional TEM images of the IGZO layer with Ta catalytic layer after thermal annealing at 300 °C under  $O_2$  atmosphere. (Partial crystallization is shown near the Ta/IGZO interface, when the IGZO thickness was 50nm.)

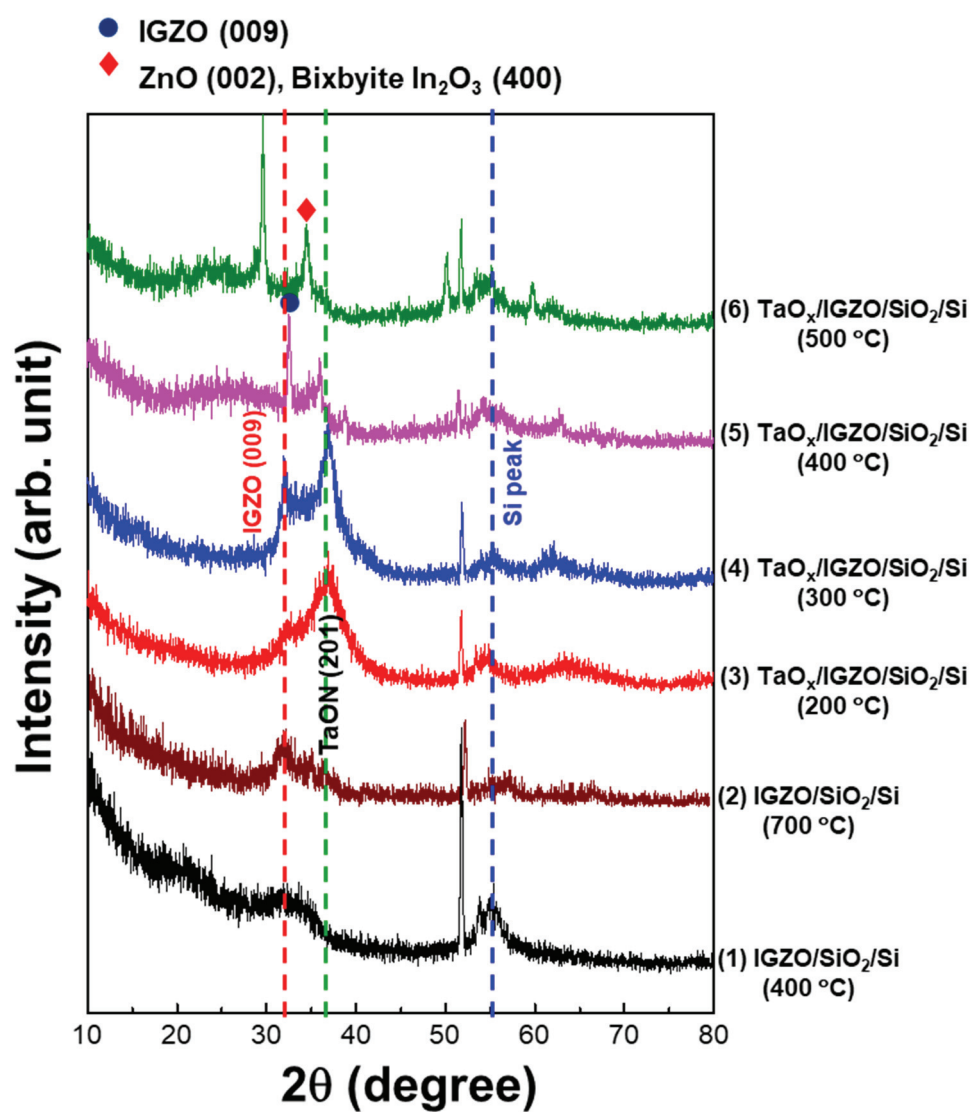

**Figure S7.** XRD spectra of the  $\text{TaO}_x/\text{SiO}_2/\text{Si}$  stack, after annealing at various temperatures under  $\text{N}_2$  atmosphere.



## V. DEVICE PERFORMANCES OF IGZO TFTS

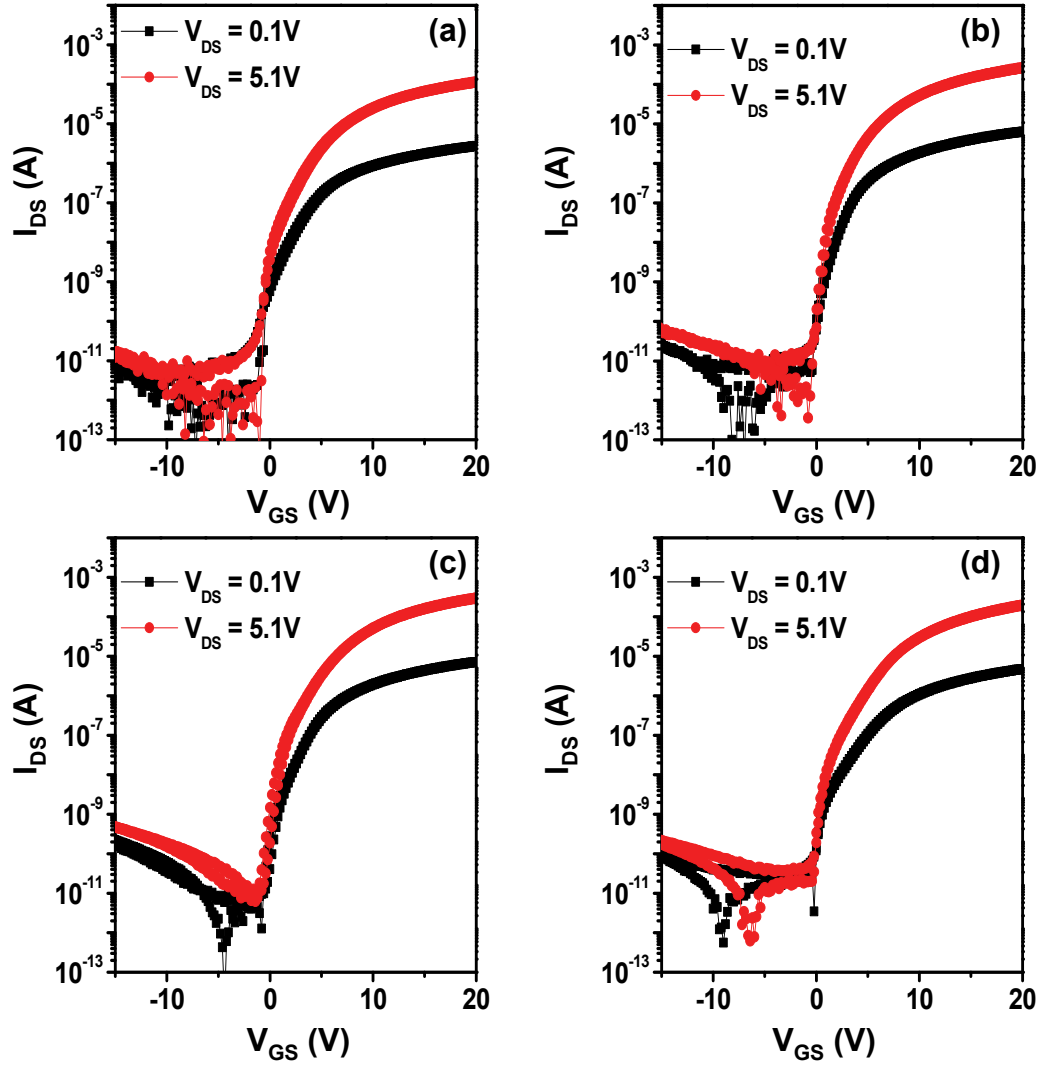

**Figure S8.** Transfer characteristics ( $I_D$ - $V_{GS}$ ) of the (a) reference IGZO device without the catalytic layer and the Ta-induced polycrystalline IGZO TFT annealed (b) 200 °C, (c) 300 °C, (d) 400 °C under  $N_2$  atmosphere.

**Table S1.** Summary of the TFT device parameters with the reference IGZO and Ta/IGZO annealed at various temperatures under N<sub>2</sub> atmosphere. Average and standard deviation values are included.

| <b>Samples</b>      | <b><math>\mu_{FE}</math> (cm<sup>2</sup>/Vs)</b> | <b>SS (V/decade)</b> | <b>V<sub>TH</sub> (V)</b> | <b>I<sub>ON/OFF</sub></b> |
|---------------------|--------------------------------------------------|----------------------|---------------------------|---------------------------|
| (a) Control Device  | 18.1 ± 0.6                                       | 0.8 ± 0.1            | 0.9 ± 0.2                 | 1.2 × 10 <sup>7</sup>     |
| (b) Ta/ IGZO 200 °C | 42.7 ± 3.4                                       | 0.5 ± 0.1            | 0.6 ± 0.4                 | 3.1 × 10 <sup>7</sup>     |
| (c) Ta/ IGZO 300 °C | 51.7 ± 4.9                                       | 0.5 ± 0.1            | 1.0 ± 0.1                 | 4.0 × 10 <sup>7</sup>     |
| (d) Ta/ IGZO 400 °C | 33.6 ± 2.9                                       | 0.6 ± 0.1            | 1.1 ± 0.5                 | 1.9 × 10 <sup>7</sup>     |
